# Supplementary material
Source: Springer Nature journal article supplement (https://www.springermedizin.de/resource/supplementary/12889_2014_7463_MOESM7_ESM.pdf/9497570)
Supplement: MOESM7 [file 9497570]

**A**

Funnel plot with pseudo 95% confidence limits

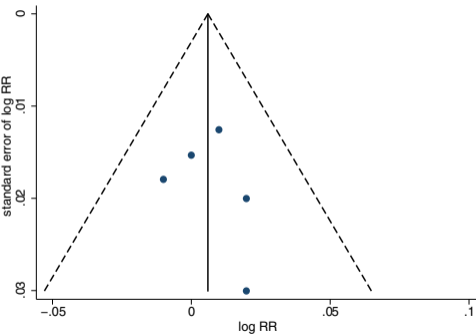

P value for Egger: 0.694

P value for Begg: 0.806

**B**

Funnel plot with pseudo 95% confidence limits

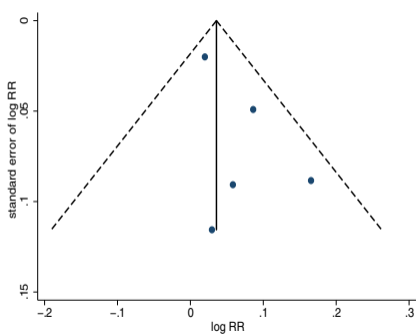

P value for Egger: 0.181;

P value for Begg: 1.000
